# Supplementary material for: Host-sensitized borate phosphors ZnGdB5O10:Mn2+/Dy3+/Sm3+
Source: Royal Society of Chemistry journal article supplement (doi:10.1039/d4dt02638a), 2024-01-01
Supplement: d4dt02638a1.pdf [file d4dt02638a1.pdf]

Supporting Information for

Host-sensitized borate phosphors  $\text{ZnGdB}_5\text{O}_{10}:\text{Mn}^{2+}/\text{Dy}^{3+}/\text{Sm}^{3+}$

*Yu Chen, Yan Gao, Rihong Cong, \* Tao Yang\**

College of Chemistry and Chemical Engineering, Chongqing University, Chongqing 401331, People's

Republic of China

\*Corresponding authors: [congrihong@cqu.edu.cn](mailto:congrihong@cqu.edu.cn); [taoyang@cqu.edu.cn](mailto:taoyang@cqu.edu.cn)

**Table S1.** Cell lattice parameters ( $a$ ,  $b$ ,  $c$ ,  $\beta$ ,  $V$ ) for  $\text{Zn}_{1-x}\text{Mn}_x\text{GdB}_5\text{O}_{10}$  ( $0.005 \leq x \leq 0.07$ ) obtained from Le Bail fitting on the powder XRD (space group:  $P2_1/n$ )

| $\text{Zn}_{1-x}\text{Mn}_x\text{GdB}_5\text{O}_{10}$ | $a$ (Å)   | $b$ (Å)   | $c$ (Å)   | $\beta$ (°) | $V$ (Å <sup>3</sup> ) |
|-------------------------------------------------------|-----------|-----------|-----------|-------------|-----------------------|
| 0.005                                                 | 8.5987(2) | 7.6031(2) | 9.4000(2) | 93.394(1)   | 613.46(2)             |
| 0.01                                                  | 8.5985(1) | 7.6039(1) | 9.4005(2) | 93.395(1)   | 613.55(2)             |
| 0.03                                                  | 8.5983(2) | 7.6061(2) | 9.4012(2) | 93.378(1)   | 613.76(2)             |
| 0.05                                                  | 8.5987(2) | 7.6082(1) | 9.4018(2) | 93.365(1)   | 614.01(2)             |
| 0.07                                                  | 8.5991(2) | 7.6103(2) | 9.4028(2) | 93.351(1)   | 614.28(2)             |

**Table S2.** Cell lattice parameters ( $a$ ,  $b$ ,  $c$ ,  $\beta$ ,  $V$ ) for  $\text{ZnGd}_{1-y}\text{Dy}_y\text{B}_5\text{O}_{10}$  ( $0.01 \leq y \leq 0.09$ ) obtained from Le Bail fitting on the powder XRD (space group:  $P2_1/n$ )

| $\text{ZnGd}_{1-y}\text{Dy}_y\text{B}_5\text{O}_{10}$ | $a$ (Å)   | $b$ (Å)   | $c$ (Å)   | $\beta$ (°) | $V$ (Å <sup>3</sup> ) |
|-------------------------------------------------------|-----------|-----------|-----------|-------------|-----------------------|
| 0.01                                                  | 8.5987(2) | 7.6038(2) | 9.4012(2) | 93.404(1)   | 613.59(2)             |
| 0.03                                                  | 8.5985(2) | 7.6031(2) | 9.3997(2) | 93.405(1)   | 613.43(2)             |
| 0.05                                                  | 8.5970(2) | 7.6032(2) | 9.3988(2) | 93.404(1)   | 613.27(2)             |
| 0.07                                                  | 8.5959(3) | 7.6030(3) | 9.3984(3) | 93.416(2)   | 613.14(4)             |
| 0.09                                                  | 8.5945(2) | 7.6029(2) | 9.3973(2) | 93.418(1)   | 612.96(3)             |

**Table S3.** Cell lattice parameters ( $a$ ,  $b$ ,  $c$ ,  $\beta$ ,  $V$ ) for  $\text{ZnGd}_{1-z}\text{Sm}_z\text{B}_5\text{O}_{10}$  ( $0.01 \leq z \leq 0.09$ ) obtained from Le Bail fitting on the powder XRD (space group:  $P2_1/n$ )

| $\text{ZnGd}_{1-z}\text{Sm}_z\text{B}_5\text{O}_{10}$ | $a$ (Å)   | $b$ (Å)   | $c$ (Å)   | $\beta$ (°) | $V$ (Å <sup>3</sup> ) |
|-------------------------------------------------------|-----------|-----------|-----------|-------------|-----------------------|
| 0.01                                                  | 8.5988(2) | 7.6024(1) | 9.3999(2) | 93.397(1)   | 613.41(2)             |
| 0.03                                                  | 8.5999(4) | 7.6029(4) | 9.4007(5) | 93.397(2)   | 613.57(5)             |
| 0.05                                                  | 8.6008(2) | 7.6036(2) | 9.4007(2) | 93.385(1)   | 613.71(2)             |
| 0.07                                                  | 8.6018(2) | 7.6035(2) | 9.4020(1) | 93.389(1)   | 613.85(2)             |
| 0.09                                                  | 8.6033(3) | 7.6035(2) | 9.4028(3) | 93.382(2)   | 614.01(3)             |

**Table S4.** Enhancement of integrated emission intensity for  $\text{ZnGd}_{1-y}\text{Dy}_y\text{B}_5\text{O}_{10}$  ( $0.01 \leq y \leq 0.09$ ) by host-sensitization effect

| $y$  | Integrated intensity (a.u.) (450-600 nm) |                                | Enhancement factor |
|------|------------------------------------------|--------------------------------|--------------------|
|      | $\lambda_{\text{ex}} = 343$ nm           | $\lambda_{\text{ex}} = 273$ nm |                    |
| 0.01 | 4251                                     | 70853                          | 16.67              |
| 0.03 | 8236                                     | 76528                          | 9.29               |
| 0.05 | 8477                                     | 65947                          | 7.78               |
| 0.07 | 7839                                     | 52541                          | 6.70               |
| 0.09 | 6373                                     | 38122                          | 5.98               |

**Table S5.** Enhancement of the Dy<sup>3+</sup> emission by Gd<sup>3+</sup>-to-Dy<sup>3+</sup> energy transfer in different hosts

| Activator        | Host                                                                                | Dy <sup>3+</sup> content | Enhancement factor | Ref.      |
|------------------|-------------------------------------------------------------------------------------|--------------------------|--------------------|-----------|
| Dy <sup>3+</sup> | ZnGdB <sub>5</sub> O <sub>10</sub>                                                  | 0.03                     | 9.29               | This work |
|                  | (Lu <sub>0.4</sub> Gd <sub>0.6</sub> ) <sub>3</sub> Al <sub>5</sub> O <sub>12</sub> | 0.025                    | 6.36               | Ref. S1   |
|                  | Mg <sub>2</sub> Gd <sub>8</sub> (SiO <sub>4</sub> ) <sub>6</sub> O <sub>2</sub>     | 0.1                      | 4.3                | Ref. S2   |
|                  | Gd <sub>2</sub> O <sub>2</sub> SO <sub>4</sub>                                      | 0.025                    | 2.8                | Ref. S3   |
|                  | Y <sub>1.2</sub> Gd <sub>0.8</sub> WO <sub>6</sub>                                  | 0.025                    | 2.7                | Ref. S4   |
|                  | Gd <sub>2</sub> O <sub>3</sub>                                                      | 0.02                     | 1.13               | Ref. S5   |

**Table S6.** Enhancement of integrated emission intensity for ZnGd<sub>1-z</sub>Sm<sub>z</sub>B<sub>5</sub>O<sub>10</sub> (0.01 ≤ z ≤ 0.09) by host-sensitization effect

| z    | Integrated intensity (a.u.) (540-730 nm) |                          | Enhancement factor |
|------|------------------------------------------|--------------------------|--------------------|
|      | λ <sub>ex</sub> = 400 nm                 | λ <sub>ex</sub> = 273 nm |                    |
| 0.01 | 23982                                    | 59470                    | 2.48               |
| 0.03 | 29693                                    | 62406                    | 2.10               |
| 0.05 | 25866                                    | 57265                    | 2.21               |
| 0.07 | 21555                                    | 44743                    | 2.08               |
| 0.09 | 20351                                    | 44039                    | 2.16               |

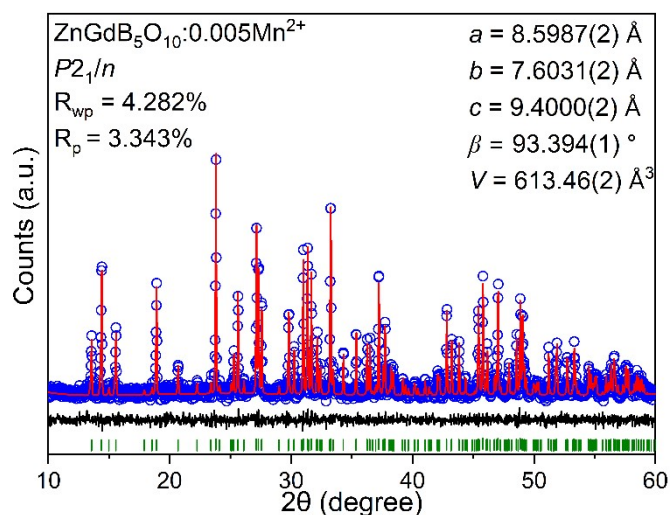

**Figure S1.** Final Le Bail fitting for  $\text{Zn}_{0.995}\text{Mn}_{0.005}\text{GdB}_5\text{O}_{10}$ . Blue circles, red and black lines represent the observed, calculated data, and the difference between them, respectively. The expected Bragg peaks positions are given as green bars at the bottom of the patterns.

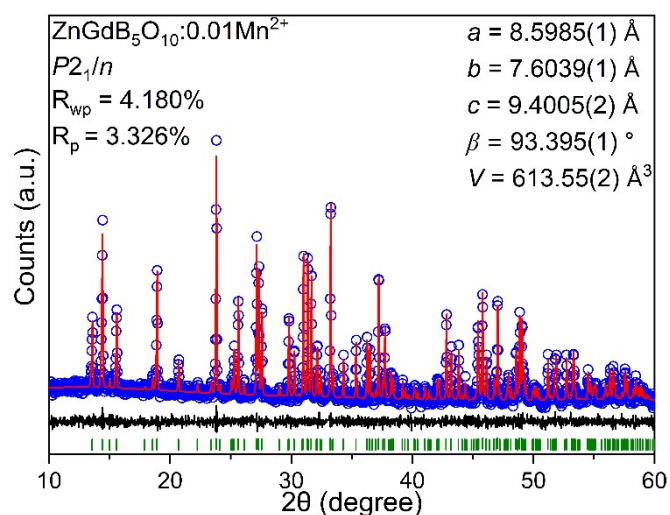

**Figure S2.** Final Le Bail fitting for  $\text{Zn}_{0.99}\text{Mn}_{0.01}\text{GdB}_5\text{O}_{10}$ .

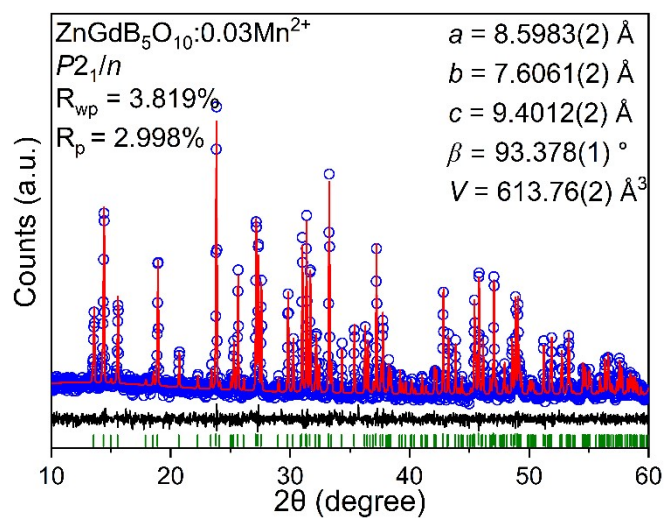

Figure S3. Final Le Bail fitting for Zn<sub>0.97</sub>Mn<sub>0.03</sub>GdB<sub>5</sub>O<sub>10</sub>.

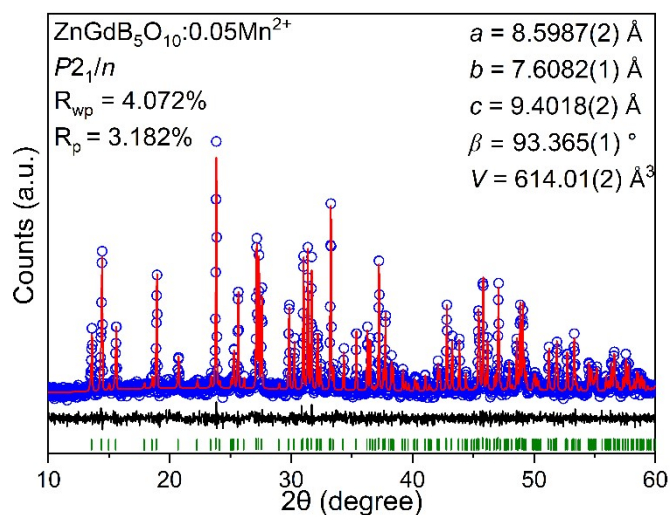

Figure S4. Final Le Bail fitting for Zn<sub>0.95</sub>Mn<sub>0.05</sub>GdB<sub>5</sub>O<sub>10</sub>.

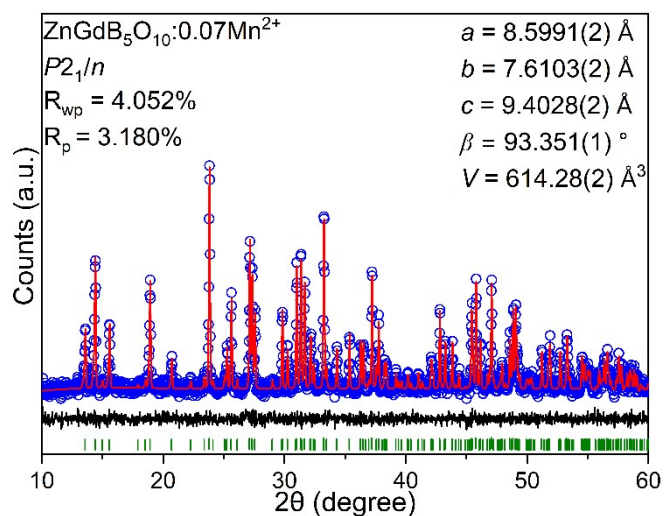

Figure S5. Final Le Bail fitting for Zn<sub>0.93</sub>Mn<sub>0.07</sub>GdB<sub>5</sub>O<sub>10</sub>.

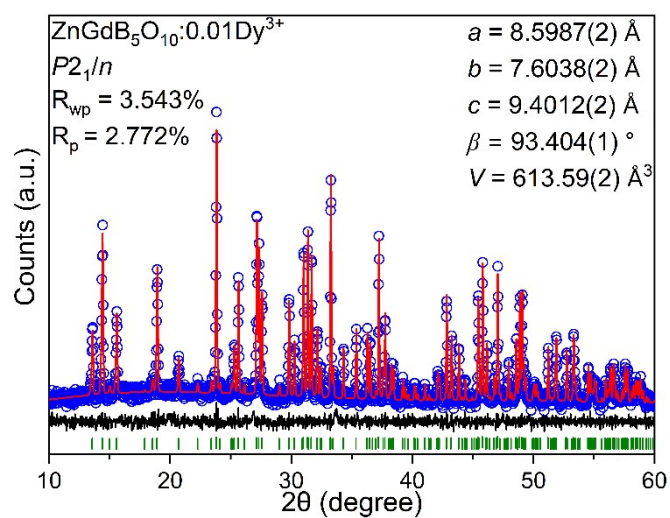

**Figure S6.** Final Le Bail fitting for ZnGd<sub>0.99</sub>Dy<sub>0.01</sub>B<sub>5</sub>O<sub>10</sub>.

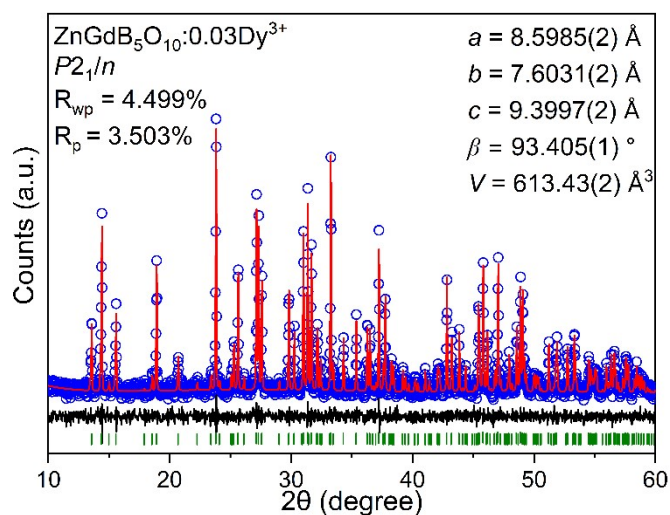

**Figure S7.** Final Le Bail fitting for ZnGd<sub>0.97</sub>Dy<sub>0.03</sub>B<sub>5</sub>O<sub>10</sub>.

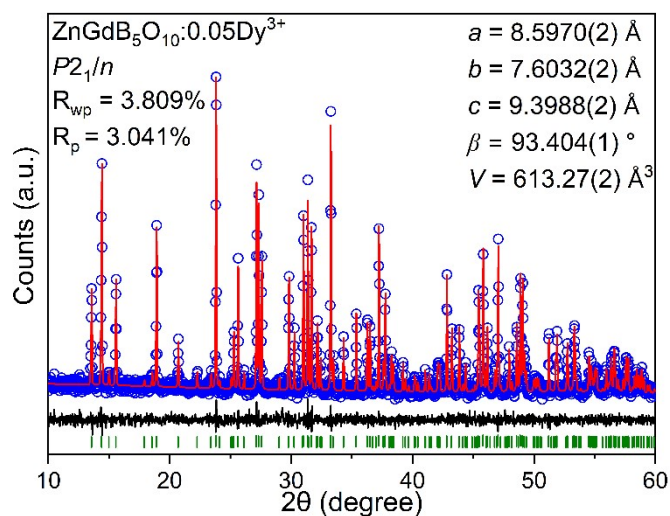

**Figure S8.** Final Le Bail fitting for ZnGd<sub>0.95</sub>Dy<sub>0.05</sub>B<sub>5</sub>O<sub>10</sub>.

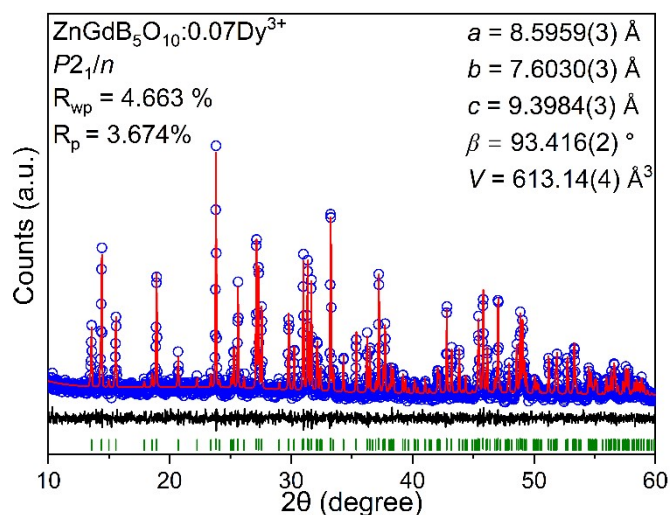

**Figure S9.** Final Le Bail fitting for ZnGd<sub>0.93</sub>Dy<sub>0.07</sub>B<sub>5</sub>O<sub>10</sub>.

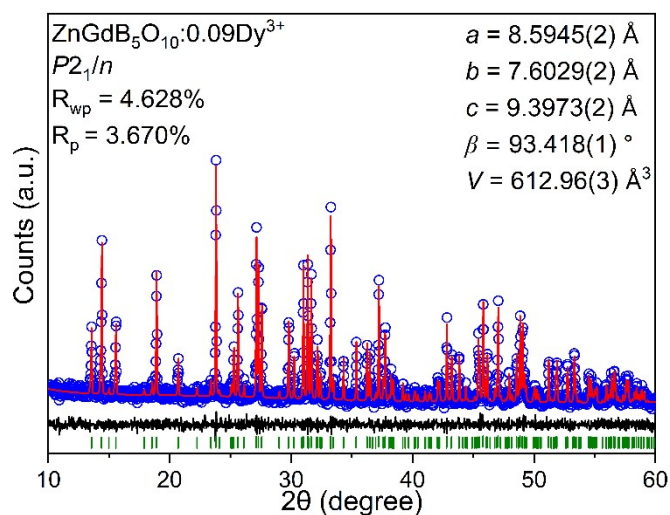

**Figure S10.** Final Le Bail fitting for ZnGd<sub>0.91</sub>Dy<sub>0.09</sub>B<sub>5</sub>O<sub>10</sub>.

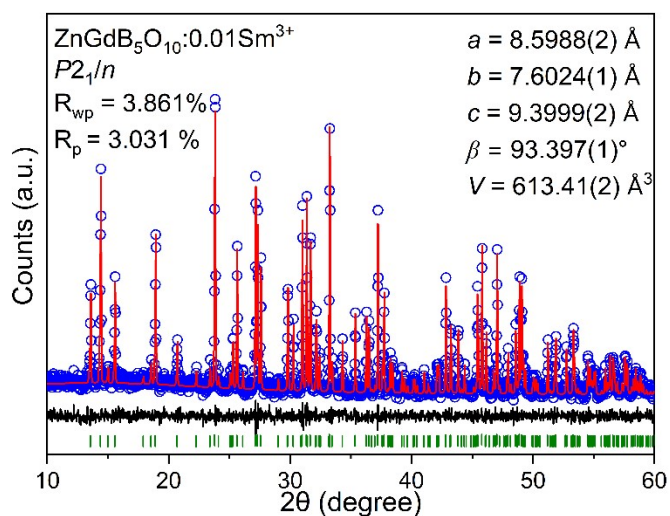

**Figure S11.** Final Le Bail fitting for ZnGd<sub>0.99</sub>Sm<sub>0.01</sub>B<sub>5</sub>O<sub>10</sub>.



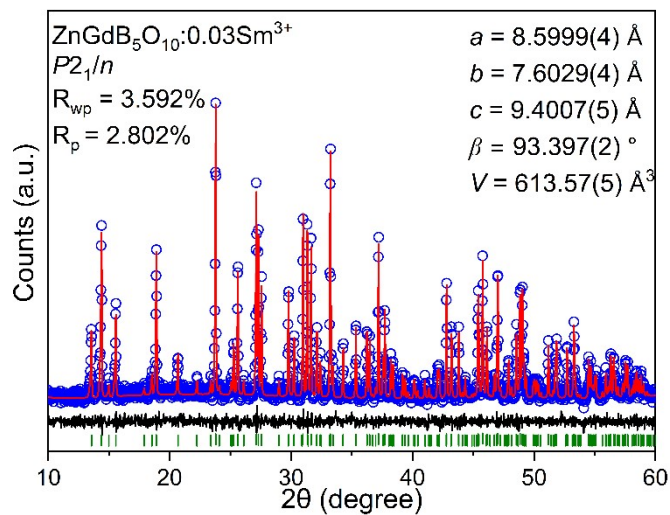

Figure S12. Final Le Bail fitting for ZnGd<sub>0.97</sub>Sm<sub>0.03</sub>B<sub>5</sub>O<sub>10</sub>.

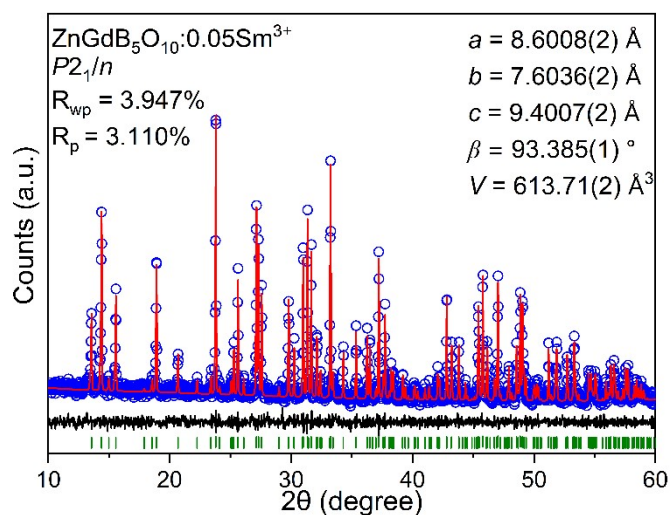

Figure S13. Final Le Bail fitting for ZnGd<sub>0.95</sub>Sm<sub>0.05</sub>B<sub>5</sub>O<sub>10</sub>.

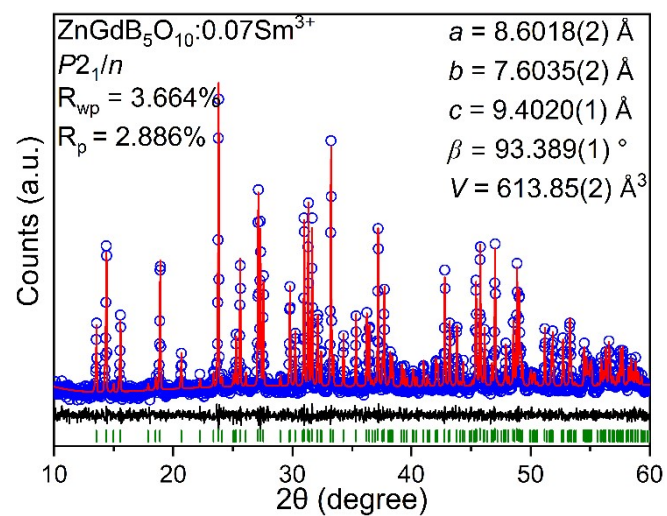

Figure S14. Final Le Bail fitting for ZnGd<sub>0.93</sub>Sm<sub>0.07</sub>B<sub>5</sub>O<sub>10</sub>.

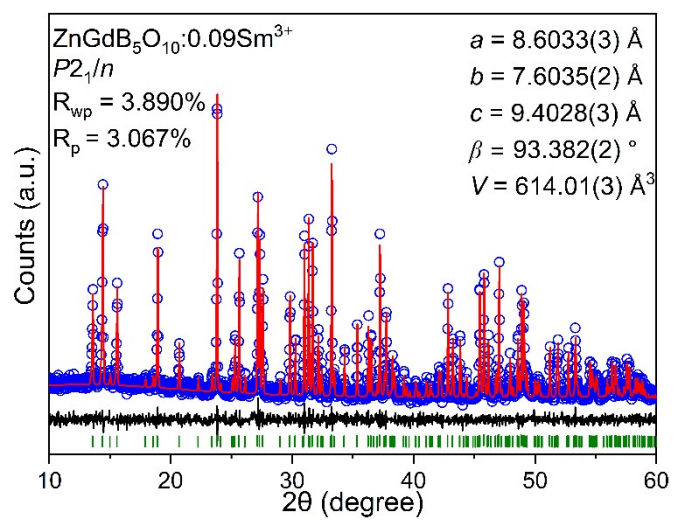

**Figure S15.** Final Le Bail fitting for ZnGd<sub>0.91</sub>Sm<sub>0.09</sub>B<sub>5</sub>O<sub>10</sub>.

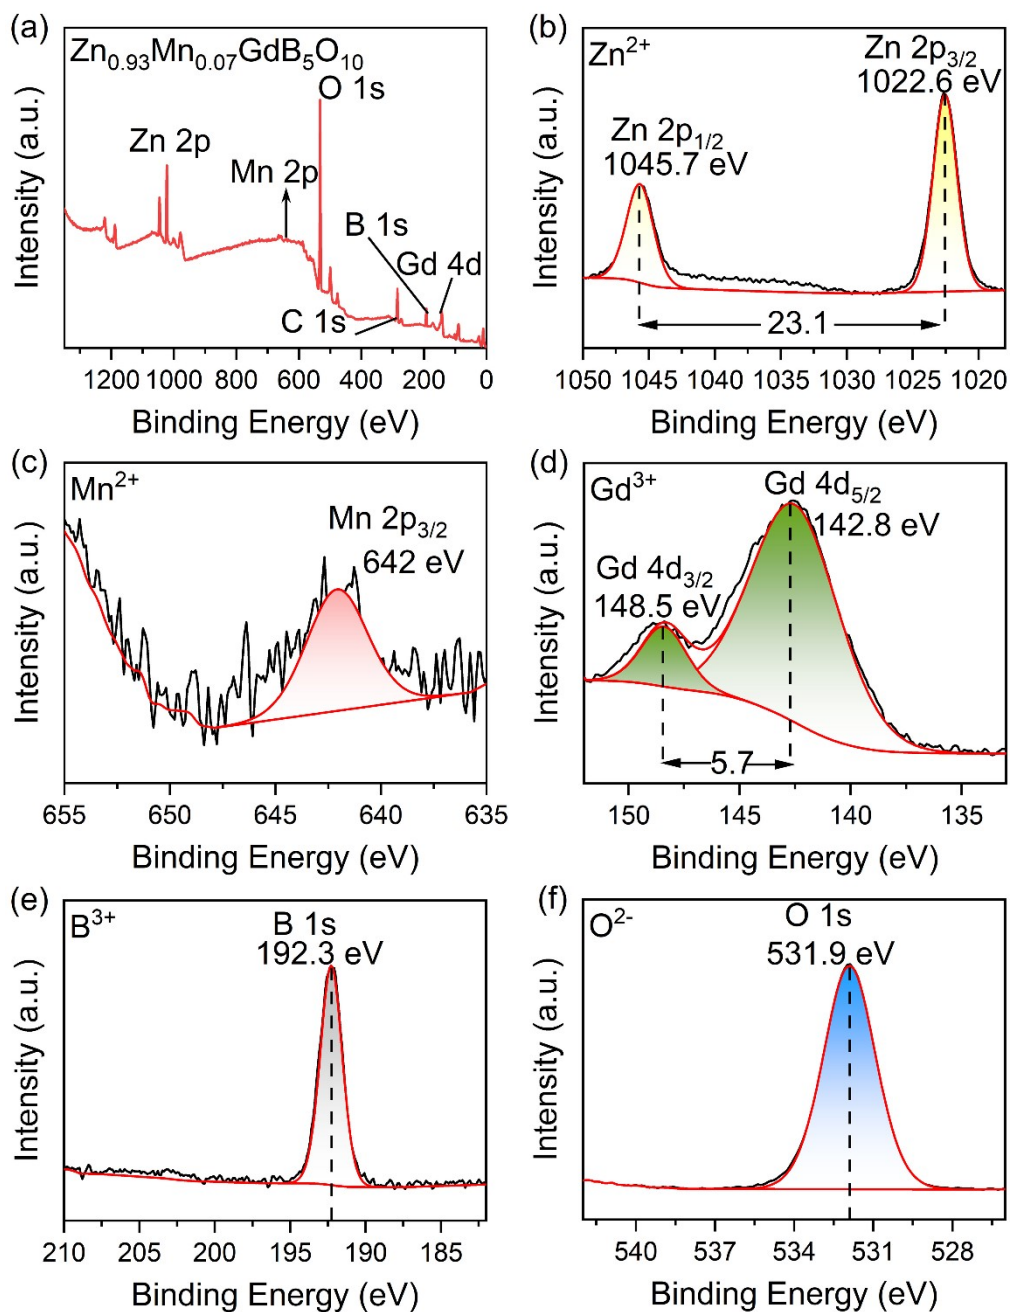

**Figure S16.** (a) XPS survey scan of  $\text{Zn}_{0.93}\text{Mn}_{0.07}\text{GdB}_5\text{O}_{10}$  and (b-f) respective spectra for each element.

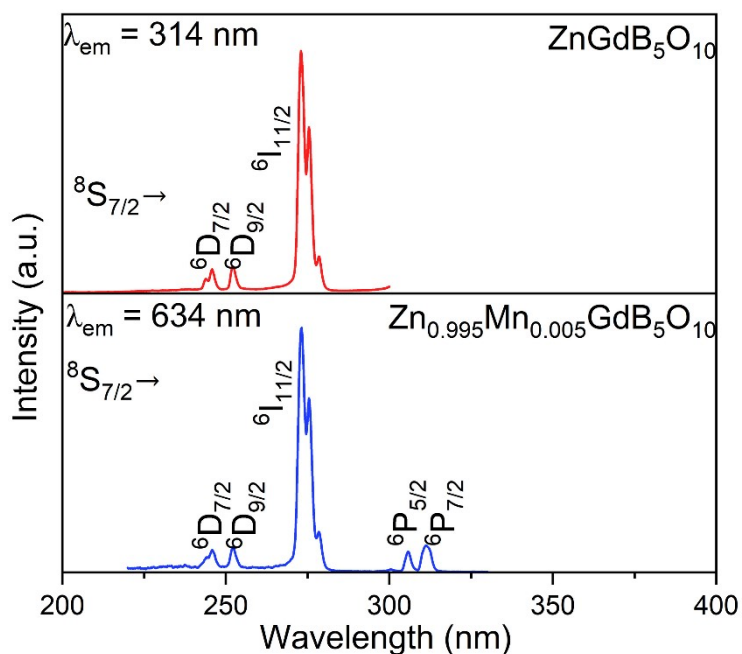

**Figure S17.** Comparison of the excitation spectra between  $\text{ZnGdB}_5\text{O}_{10}$  and  $\text{Zn}_{0.995}\text{Mn}_{0.005}\text{GdB}_5\text{O}_{10}$  by monitoring the emission at 314 nm ( $\text{Gd}^{3+}$ ) and 634 nm ( $\text{Mn}^{2+}$ ), respectively.

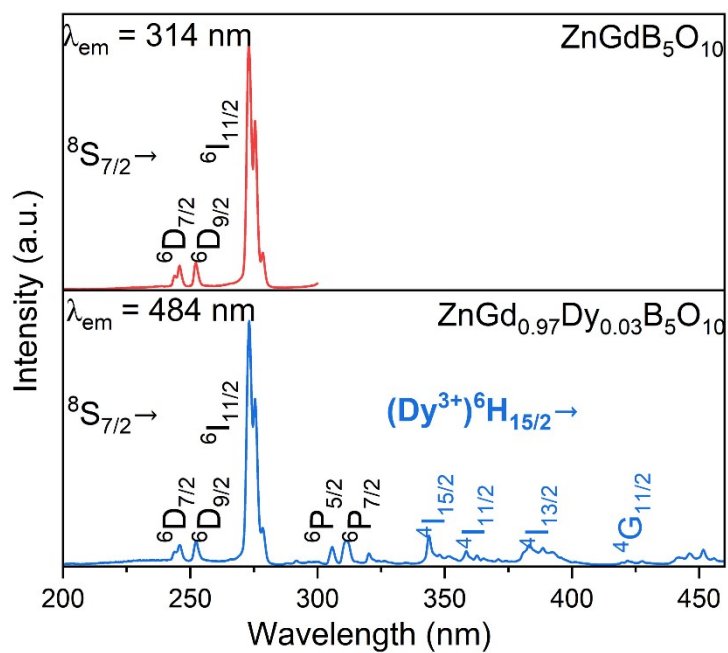

**Figure S18.** Comparison of the excitation spectra between  $\text{ZnGdB}_5\text{O}_{10}$  and  $\text{ZnGd}_{0.97}\text{Dy}_{0.03}\text{B}_5\text{O}_{10}$  by monitoring the emission at 314 nm ( $\text{Gd}^{3+}$ ) and 484 nm ( $\text{Dy}^{3+}$ ), respectively.

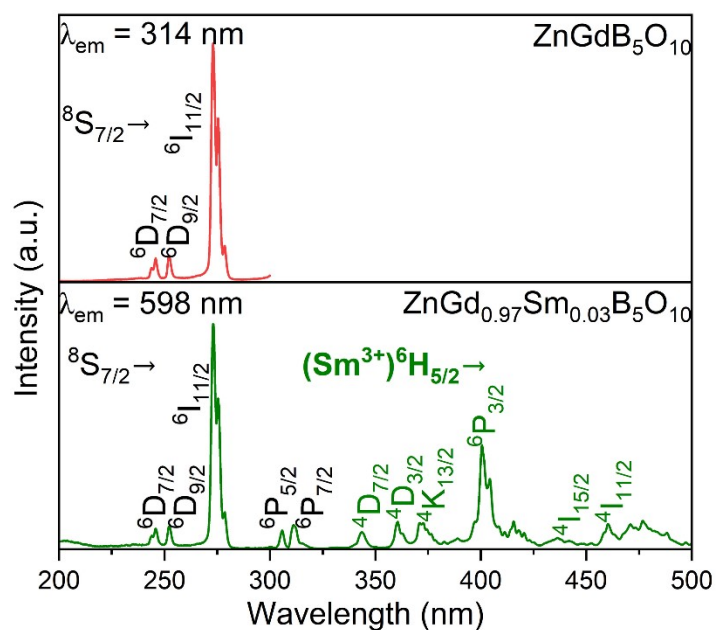

**Figure S19.** Comparison of the excitation spectra between  $\text{ZnGdB}_5\text{O}_{10}$  and  $\text{ZnGd}_{0.97}\text{Sm}_{0.03}\text{B}_5\text{O}_{10}$  by monitoring the emission at 314 nm ( $\text{Gd}^{3+}$ ) and 598 nm ( $\text{Sm}^{3+}$ ), respectively.

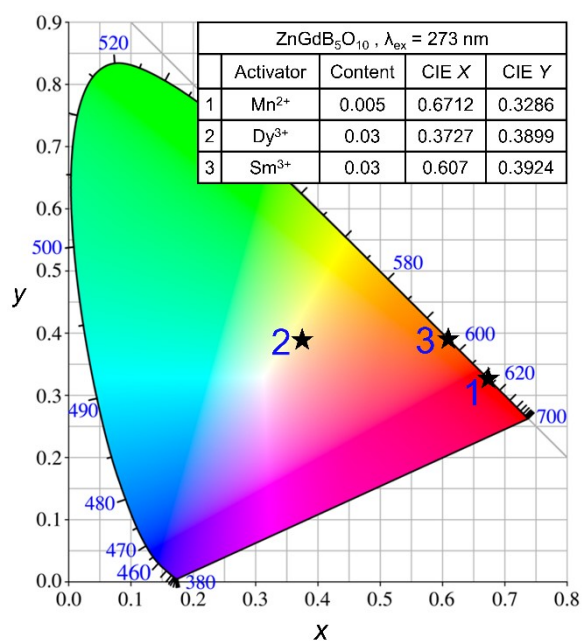

**Figure S20.** Calculated CIE chromaticity coordinate under the excitation at 273 nm.

## REFERENCES

S1. J. K. Li, W. Z. Wang, B. Liu, G. B. Duan and Z. M. Liu, *Sci. Rep.*, 2020, **10**, 2285.

S2. Q. Su, Z. W. Pei, J. Lin and F. Xue, *J. Alloys Compd.*, 1995, **225**, 103-106.

S3. X. L. Yang, B. Lu, X. Y. Wang and Y. Sakka, *Luminescence*, 2021, **37**, 199-207.

S4. W. F. Rao, Y. Guan, J. Y. Yang, Q. Q. Huang and J. H. Miao, *J. Mater. Sci. Mater. Electron.*, 2019, **30**, 4393-4399.

S5. W. Z. Wan, J. K. Li, G. B. Duan, W. L. Zhao, B. Q. Cao and Z. M. Liu, *J. Lumin.*, 2017, 192, 1056-1064.
